# Supplementary material for: TRPV4 channel activation selectively inhibits tumor endothelial cell proliferation
Source: PubMed Central journal article supplement (PMC4585691; doi:10.1038/srep14257), 2015-09-21

## **TRPV4 channel activation selectively inhibits tumor endothelial cell proliferation**

Roslin J. Thoppil<sup>1,2#</sup>, Ravi K. Adapala<sup>1,2#</sup>, Holly C. Cappelli<sup>1,2</sup>, Vinay Kondeti<sup>3</sup>, Andrew C. Dudley<sup>4</sup>, J. Gary Meszaros<sup>1,2</sup>, Sailaja Paruchuri<sup>3</sup>, and Charles K. Thodeti<sup>1,2\*</sup>

<sup>1</sup>Department of Integrative Medical Sciences, Northeast Ohio Medical University, Rootstown, OH 44272; <sup>2</sup>School of Biomedical Sciences, Kent State University, Kent, OH 44240; <sup>3</sup>Department of Chemistry, University of Akron, Akron, OH 44325; <sup>4</sup>Department of Cell and Molecular Physiology, University of North Carolina, Chapel Hill, NC 27599.

# These authors contributed equally to this work.

Running Title: TRPV4 regulates tumor endothelial cell proliferation.

\*Address all correspondence to: Charles K. Thodeti, Ph.D., Department of Integrative Medical Sciences, Northeast Ohio Medical University, Rootstown, OH 44272 (Tel: 330-325-6423; Fax: 330-325-5912; Email: [cthodeti@neomed.edu](mailto:cthodeti@neomed.edu))

Keywords: Angiogenesis, Endothelial, ERK1/2, Proliferation, Tumor Endothelial Cell, TRPV4

## Supplementary Information

### Supplementary Figure Legends:

**Fig.S1.** qPCR analysis showing reduced expression of TRPV4 mRNA in TEC compared NEC.

**Fig.S2.** Photomicrographs showing the efficiency of TRPV4-EGFP transfection in tumor endothelial cells.

**Fig.S3. A)** Representative Western blots depicting AKT phosphorylation in NEC and TEC treated or untreated with GSK (100 nM). **B)** Densitometric analysis of the Western blots for AKT phosphorylation. AKT phosphorylation was measured by normalizing phospho-AKT to total-AKT. Significance was set at  $p \leq 0.05$  and compares NEC to NEC treated with GSK and NEC to TEC.

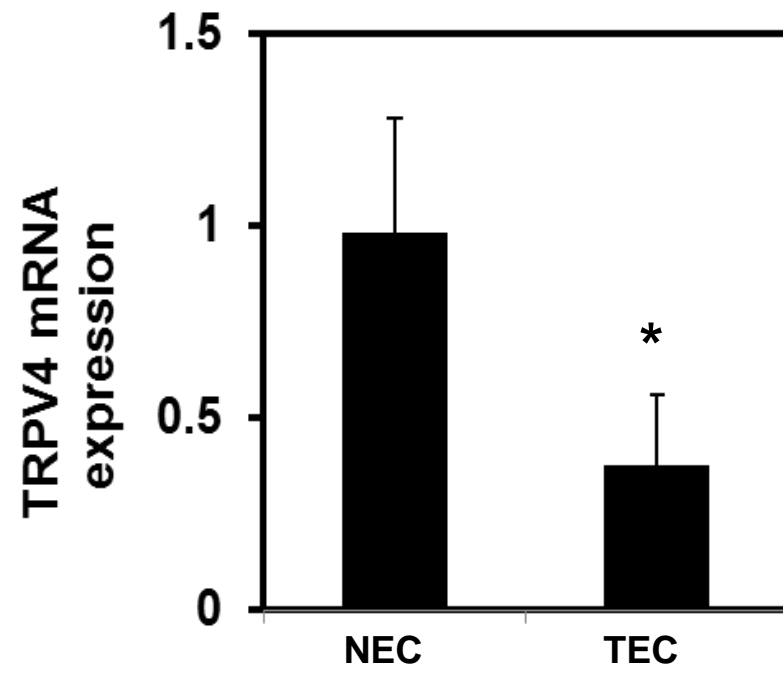

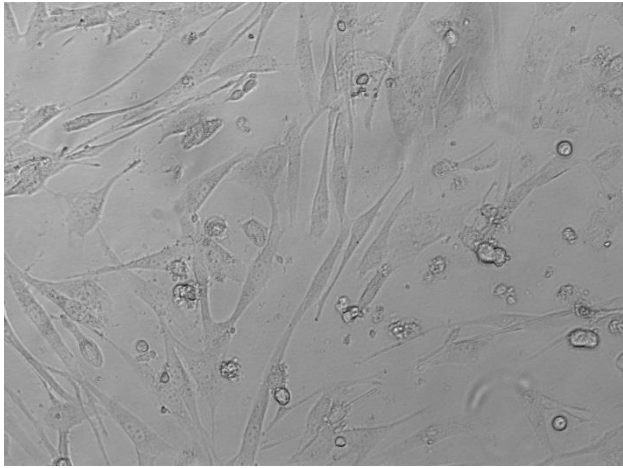

**Phase contrast**

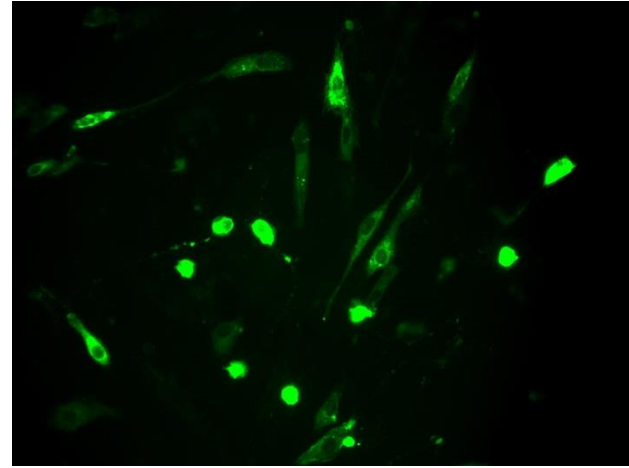

**EGFP**

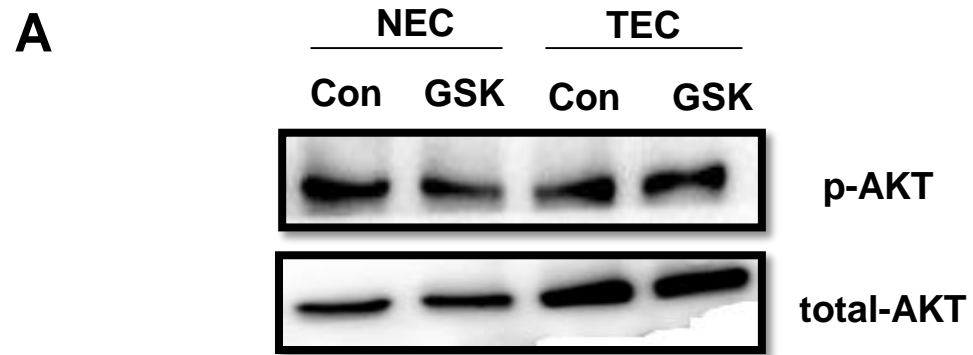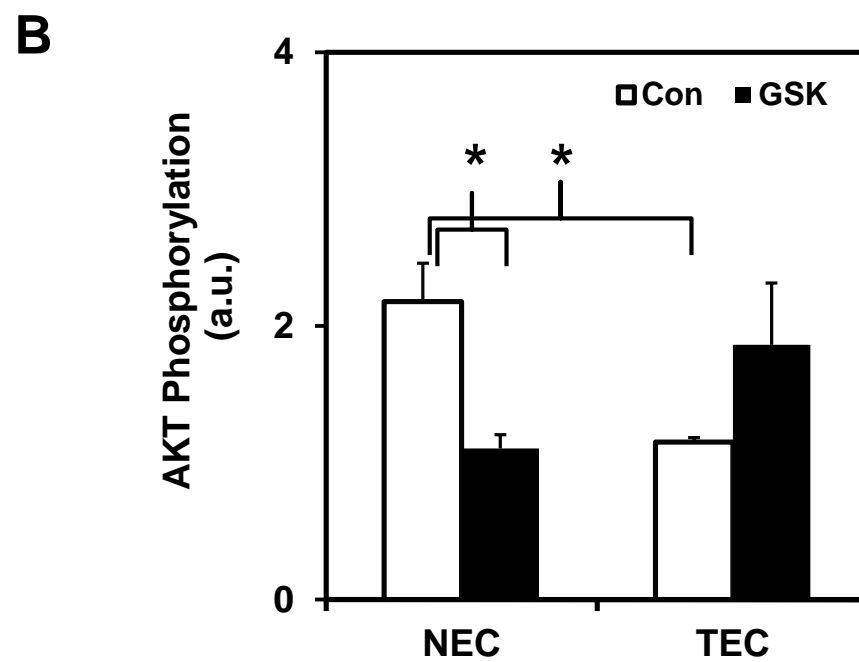

Supplement: srep14257-s1.pdf [file srep14257-s1.pdf]
